# Supplementary material for: Safety and tolerability of a multilineage-differentiating stress-enduring cell-based product in neonatal hypoxic-ischaemic encephalopathy with therapeutic hypothermia (SHIELD trial): a clinical trial protocol open-label, non-randomised, dose-escalation trial
Source: PubMed Central journal article supplement — BMJ Open. 2022 Apr 25;12(4):e057073. doi: 10.1136/bmjopen-2021-057073 (PMC9045108; doi:10.1136/bmjopen-2021-057073), 2022-04-25
Supplement: bmjopen-2021-057073supp001.pdf [file bmjopen-2021-057073supp001.pdf]

整理番号：312005  
治験実施計画書番号：CAMCR-014  
名古屋大学医学部附属病院 第3.0版  
作成日：2021年11月9日  
代諾者用

医師主導治験

## 説明文書・同意文書

### ～「低体温療法を実施した新生児低酸素性虚血性脳症に対する CL2020の安全性及び<sup>にんようせい</sup>忍容性<sup>ぜんそう</sup>を検討する用量漸増臨床試験」～

現在、私たち（担当医師）は、患者さんの協力を得て、開発中の<sup>さいせいりょう</sup>再生医療<sup>とうせいひん</sup>等製品であるCL2020の安全性と効き目を調べるための臨床試験（<sup>ちけん</sup>治験）に取り組んでいます。

今回、あなたにこの治験の内容について説明させていただきます。この説明文書は、私たちの説明をおぎない、あなたの理解を深めるためのものですのでよくお読みになり、治験にご協力いただけるかどうかご検討ください。

この治験に参加するかどうかはあなたの自由です。治験に参加した後でも、いつでも自由にやめることができます。もし参加されなくても、あなたやあなたのお子さんが不利益を被ることは全くありません。

この治験に参加するかどうかを決めていただくためには、あなたに治験の内容についてできるだけ多く知っていただくことが必要です。説明の中でわかりにくい言葉や疑問、質問がありましたらどんなことでも遠慮なくお尋ねください。

整理番号：312005  
治験実施計画書番号：CAMCR-014  
名古屋大学医学部附属病院 第3.0版  
作成日：2021年11月9日  
代諾者用

## 目次

|                                   |    |
|-----------------------------------|----|
| 1. 治験について .....                   | 2  |
| 2. あなたのお子さんの病気（症状）について .....      | 5  |
| 3. 現在の治療法について .....               | 5  |
| 4. 「CL2020」について .....             | 6  |
| 5. 治験の目的について .....                | 7  |
| 6. 治験の方法について .....                | 7  |
| 7. 予測される心身の健康に対する利益と不利益について ..... | 11 |
| 8. 治験の中止について .....                | 17 |
| 9. この治験に関する新たな情報が得られた場合について ..... | 17 |
| 10. 副作用などの健康被害が生じた場合の補償について ..... | 17 |
| 11. 費用の負担について .....               | 18 |
| 12. プライバシーの保護について .....           | 19 |
| 13. 治験への参加の自由と同意撤回の自由について .....   | 19 |
| 14. 守っていただきたいことについて .....         | 20 |
| 15. 利益相反について .....                | 20 |
| 16. 知的財産権について .....               | 21 |
| ＜担当医師の連絡先および病院の相談窓口＞ .....        | 22 |

整理番号：312005

治験実施計画書番号：CAMCR-014

名古屋大学医学部附属病院 第3.0版

作成日：2021年11月9日

代諾者用

## 1. 治験について

新しい薬や製品（再生医療等製品<sup>注</sup>）：組織・細胞加工製品または遺伝子治療製品）が患者さんの治療に使われるようになるまでには、薬や製品としての治療効果と安全性を十分に調べなければなりません。新しい製品の場合は、まず様々な細胞の中から「製品の候補」を選び出し、いろいろな動物や病気のモデルを使い、「製品の候補」の性能、治療効果と安全性について調べます。そして期待される結果が得られた場合は、「製品の候補」が人の病気に役立つかどうかを患者さんに使っていただいて調べます。

<sup>注</sup> 再生医療等製品：以下に当てはまる製品のことで、政令（内閣が決めるルール）で定められたものをいいます。

- ①人または動物の細胞に培養などの加工をした製品（体の表面に付けたり体内に入れたりして、体の形やはたらきを元の状態に近づけるもの、および病気の治療・予防を目的として使用するもの）
- ②遺伝子治療を目的として、体内に入れる（細胞内へ導入する）ことで使用する製品（遺伝子治療用製品）

このように、人での性能、治療効果と安全性を調べる試験のことを「臨床試験」と言い、その中でも国（厚生労働省）に「製品」として認めてもらうために行う臨床試験を「治験」と呼んでいます。また、治験には、製薬会社や医療機器メーカーなどの企業が主体となって実施する治験と、医師自らが計画を立てて実施する治験（医師主導治験）があり、今回あなたに説明する治験は、この「医師主導治験」です。治験には一般の治療と異なり、研究的な側面があります。また、治験で使われる製品を「治験製品」といいます。

このような治験によって得られた結果は、患者さんのプライバシーに関わる情報を切り離した上で報告書にまとめ、最終的には厚生労働省などの規制当局に提出する資料となります。またこれらの資料は、学術論文の発表、「製品」として販売される際の添付文書<sup>注</sup>といった形で社会に還元され、将来同じ病気になった多くの患者さんの治療に役立つこととなります。また、現在私たちが使用しているくすりを含めた「製品」は、すべて長い年月をかけて、このような治験を積み重ねることによって生み出されたものです。

<sup>注</sup> 再生医療等製品を販売する際に添付することが義務付けられている文書で、法令によって定められた項目（再生医療等製品の場合は、「効能、効果または性能」「用法および用量または使用方法」「不具合・副作用」「臨床試験成績」など）が書かれています。

整理番号：312005  
治験実施計画書番号：CAMCR-014  
名古屋大学医学部附属病院 第3.0版  
作成日：2021年11月9日  
代諾者用

整理番号：312005  
 治験実施計画書番号：CAMCR-014  
 名古屋大学医学部附属病院 第3.0版  
 作成日：2021年11月9日  
 代諾者用

### <新しい「製品」の開発の仕組み>

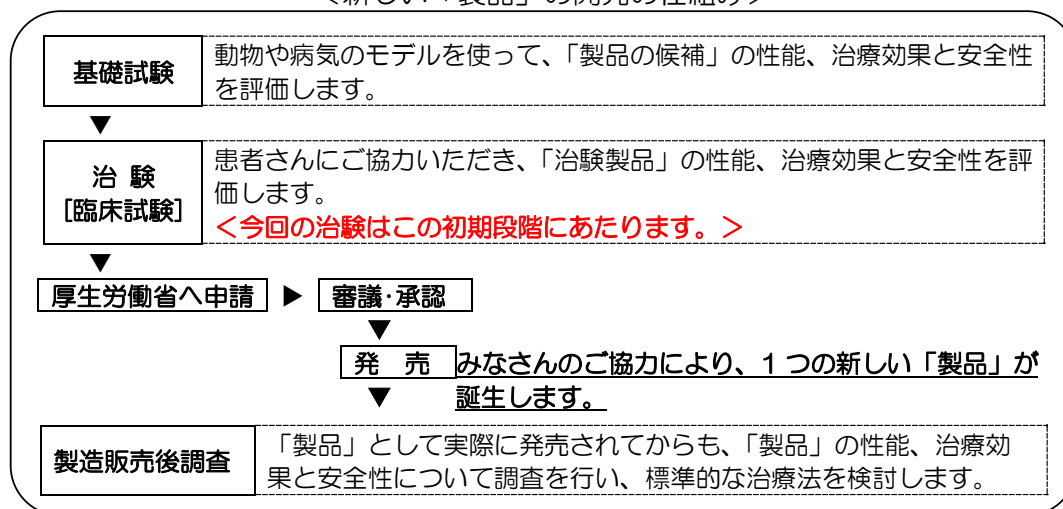

治験は、国が定めた「再生医療等製品の臨床試験の実施の基準に関する省令（再生医療等製品 GCP 省令）」というルールに従い、患者さんの権利が守られ、不必要な危険にさらされないよう倫理的に、かつ科学的妥当性をもって行う必要があります。

また、この治験を行うことについては、病院内に設置されている ちけんしんさいいんかい 治験審査委員会 で審査を受け、すでに承認されています。

#### 「名古屋大学医学部附属病院 治験審査委員会」について

設置者：名古屋大学医学部附属病院長

住 所：〒466-8560 愛知県名古屋市昭和区鶴舞町 65

患者さんの安全を守る立場から、治験の内容が科学的および倫理的に妥当であるかどうかの審議を行い、病院長に意見を述べる委員会です。今後、この治験が行われている間に新しい情報がわかった場合には、その内容を確認して、引き続きこの治験を正しく安全に行うことができるかどうかを審査していきます。

なお、治験審査委員会の手順書（審査の進め方を示した文書）や議事概要（話し合いの記録）、委員の名簿などは、当院の先端医療・臨床研究支援センター（中央診療棟地下1階）に直接お越しいただければ、いつでも内容を確認していただくことができます。また、各文書の内容は先端医療・臨床研究支援センターのホームページでも公開しております。（URL：<http://www.nu-camcr.org/cms/ctc/public/giji/>）

整理番号：312005  
治験実施計画書番号：CAMCR-014  
名古屋大学医学部附属病院 第3.0版  
作成日：2021年11月9日  
代諾者用

## ＜医師主導治験とは＞

通常の治験は、製薬会社などの企業が医療機関に治験を依頼して行われます。しかし、今回の治験は、私たち医師が自ら治験を実施するもので「医師主導治験」と呼びます。医師主導治験は、通常、製薬会社が行う治験の業務を医師自らが行うもので、治験中に発生する検査費用の負担方法が異なるなど、製薬会社が行う治験とは少し異なる点があります。

具体的には、製薬会社が実施する場合は製薬会社が検査費用の全額を負担しますが、医師主導治験の場合は患者さんの健康保険を適用します。費用負担に関する詳細は「11. 費用の負担について」を参照してください。

## 2. あなたのお子さんの病気（症状）について

低酸素性虚血性脳症<sup>ていさんそせいきょけつせいのうしょう</sup>とは、出産直前や出産の際に、何らかの原因で胎盤血流に問題が生じ、赤ちゃんの脳に十分な血液や酸素が届かなくなり、脳に傷害を受けてしまう疾患です。脳に傷害を受けることで、今後、運動麻痺<sup>うんどうまひ</sup>、てんかん（脳の細胞が通常とは異なる活動をすることによって引き起こされる症状）、精神発達遅滞<sup>せいしんはったつちたい</sup>などの神経症状が起こる可能性があります。中等症～重症の場合は、死亡や重度の後遺障害をきたしてしまう可能性も高いことが知られています。

## 3. 現在の治療法について

中等症～重症の新生児低酸素性虚血性脳症に対する治療としては、生後6時間以内に開始して72時間継続する低体温療法<sup>ていたいおんりょうほう</sup>があり、あなたのお子さんに対してもすでにこの治療が行われています。低体温療法は、体温を一定温度下げることで脳の負担を減らし、脳を保護する治療法です。この治療法は、新生児低酸素性虚血性脳症に対する有効性が確認されており、日本をはじめとする多くの国で治療法として取り入れられていますが、その効果は限定的であり、その他の有用な治療法もありません。そのため、低酸素性虚血性脳症に対する新規治療法の開発が望まれています。

整理番号：312005  
治験実施計画書番号：CAMCR-014  
名古屋大学医学部附属病院 第3.0版  
作成日：2021年11月9日  
代諾者用

## 4. 「CL2020」について

株式会社生命科学インスティテュートが開発中の「CL2020」は、ヒト（同種）  
SSEA-3陽性間葉系幹細胞<sup>ようせいかんようけいかんさいぼう</sup>を多く含む細胞製剤です。ただし、今回の治験では、CL2020の細胞以外の成分を除去後、酢酸リンゲル液で再度分散することとされています。

「SSEA-3」とは細胞の表面に存在する物質の一つであり、発生（受精卵が細胞分裂を繰り返し、次第に各器官が形成され個体ができ上がっていく過程）のごく初期の過程にある細胞だけに存在すると考えられていました。ところが2010年に、成人の体内の細胞からSSEA-3を持つ細胞（SSEA-3陽性細胞）が発見され、この細胞は、その特性から「Muse細胞」<sup>ミューズさいぼう</sup>と命名されました。その後の研究で、Muse細胞は、さまざまな細胞になる能力（多能性）を持っているものの、腫瘍化<sup>しゅようか</sup>（がんに変化すること）しないこと、体内の各所にごく少数存在し、臓器や組織が傷害を受けると傷害部位に多く集まることなどが明らかにされており、私たちの体にもともと備えられている自然の修復機能を担う細胞ではないかと考えられています。

CL2020は、ヒトの細胞（ヒト細胞）からSSEA-3陽性細胞を培養して製造した細胞製剤です。

心筋梗塞<sup>しんきんこうそく</sup>（検証的試験※2）、<sup>せきすいそんしょう</sup>脊髄損傷、筋萎縮性側索硬化症（ALS）、及びCOVID-19に伴う急性呼吸窮迫症候群<sup>きゅうはく</sup>（様々な疾患が原因となり、重度の呼吸不全となる症状の総称：ARDS）の患者さんを対象とした治験を実施中であり、また、心筋梗塞（探索的試験※3）、脳梗塞、及び表皮水疱症<sup>ひょうひすいほうしょう</sup>（日常生活における軽微な外力によって皮膚のただれ（びらん）や水ぶくれ（水疱）を生じる遺伝性の皮膚病）の患者さんを対象とした治験が完了しています。また、同じ時点で、本治験では9例の新生児に投与されました。

これまでの動物を用いた検討で、生後間もないラットを用いた低酸素性虚血性脳傷害モデルにCL2020の細胞を投与したところ、成長後の行動学的異常が軽減しました。また、生後間もないラットを用いた低酸素性虚血性脳傷害モデルでの脳室拡大（傷害を受けた脳が小さくなり、空洞になる状態）や神経萎縮を軽減する傾向も確認できました。しかし、現時点ではヒトの低酸素性虚血性脳症に対する有効性は明らかになっていません。

※1 プラセボ（偽薬）：見た目は薬や製品と同じで、薬や製品としての効き目のある成分を全く含

整理番号：312005

治験実施計画書番号：CAMCR-014

名古屋大学医学部附属病院 第3.0版

作成日：2021年11月9日

代諾者用

んでいないもの。本来、体に対する影響はないはずですが、人によっては何らかの効き目や症状がみられることがあります。

※2 検証的試験：多くの患者さんにご協力いただき、主にプラセボ（偽薬）や既存の治療方法と比較して治験製品の効き目と安全性を評価する試験です。

※3 探索的試験：少数の患者さんにご協力いただき、治験製品の効き目と安全性を評価し、治験製品の適切な量や使い方を決める試験です。

## 5. 治験の目的について

この治験の目的は、低体温療法を実施した新生児低酸素性虚血性脳症の患者さんにご協力いただき、CL2020の細胞の安全性を確認することです。

この治験は、当院のみで実施し、最大12人の患者さんに参加していただく予定です。

## 6. 治験の方法について

この治験では、患者さんの安全を確保しつつ、科学的に適切な評価を行うために、以下のような基準を設けています。

- 治験に参加していただける方の主な基準
  - 1) 新生児低酸素性虚血性脳症と診断された患儿
  - 2) 在胎36週以上で出生した患儿
  - 3) 生後6時間以内に低体温療法を開始し、72時間程度の冷却を実施した患儿
  - 4) 出生体重が1,800g以上の患儿
  - 5) 生後14日以内に治験に登録できる患儿
  - 6) 同意取得時の代諾者である親権者が成人（未成年であっても婚姻している場合も含む）である患儿
- 治験に参加していただけない方の主な基準
  - 1) 先天的な異常や染色体異常が認められている又は疑われる患儿
  - 2) 生後1ヵ月以内に切開を伴う手術（気管切開や胃瘻形成は除く）や放射線療法が予定されている患儿
  - 3) 生後1ヵ月以内に全身作用を目的とする副腎皮質ステロイドによる治療を連続5日以上継続することが予定されている患儿

整理番号：312005

治験実施計画書番号：CAMCR-014

名古屋大学医学部附属病院 第3.0版

作成日：2021年11月9日

代諾者用

- 4) 血糖値が継続して高い患儿
- 5) 他の臨床試験に参加している患儿
- 6) 活動性の感染症を有している又は疑われる患儿
- 7) HBs抗原、HCV抗体、HIV抗体、HTLV-1抗体又は梅毒血清反応のいずれかが陽性の患儿
- 8) 重い過敏症又はアナフィラキシー反応の経験のある患儿
- 9) 新生児低酸素性虚血性脳症と関連しない、心臓、肝臓、腎臓、肺、血液などに重い病気のある患儿
- 10) その他、医師が不適当と判断した場合

また、ここに挙げた主な基準の他に、治験参加の同意をいただいてから検査を行い、確認する必要がある基準がいくつかあります。そのため、同意をいただいても、その検査結果によっては治験に参加できない場合があります。なお、治験が始まってから、基準を満たしていないことがわかった場合や、治験を続けられない方がよいと私たちが判断した場合は、途中で治験を中止することもありますので、ご了承ください。

整理番号：312005  
治験実施計画書番号：CAMCR-014  
名古屋大学医学部附属病院 第3.0版  
作成日：2021年11月9日  
代諾者用

### 治験製品の投与方法と投与量について

この治験では、治験製品であるCL2020の細胞を院内で調製し、1回静脈内投与します。その細胞の投与量は、2つの群に分かれており、治験に参加された順番に従って、以下のどちらかの用量を投与します。低用量群は、体重換算すると、これまでの成人での治験で投与されてきた投与量と同量になり、高用量群は、成人に投与した投与量よりも体重換算で10倍の投与量になります。なお、私たちがCL2020を本治験のために調製するにあたっては、CL2020の細胞以外の成分を除去後、酢酸リンゲル液で再度分散することとしています。

#### ■低用量群 150万個の細胞：3～6名

この治験に参加された3人目までの方は、「CL2020」1バッグ（約1,500万個の細胞）分の細胞を酢酸リンゲル液で希釈し、そのうちの（約150万個の細胞）を静脈内投与します。患者さんの安全性を確認しながら、6人目の方までこの用量での投与を行う場合があります。

#### ■高用量群 1,500万個の細胞：3～6名

低用量群での安全性確認後に最大6名の患者さんに「CL2020」1バッグ（約1,500万個の細胞）分の細胞を酢酸リンゲル液で希釈し、その（約1,500万個の細胞）を静脈内投与します。

### 治験のスケジュール

この治験への参加に同意された後、治験に参加いただけるかどうかを確認するための診察や検査を行います。

その結果、参加の基準を満たした患者さんに治験製品の投与を日齢5から14のどこかで1回行います。

治験製品投与後は78週（1年半）後まで、次ページのスケジュール表にしたがって観察や検査などを行います。そのため、治験の参加予定期間は1年半となります。その後は治験全体が終了するまで、あなたのお子さん体の状態を診察または電話などで確認させていただきます。

整理番号：312005

治験実施計画書番号：CAMCR-014

名古屋大学医学部附属病院 第3.0版

作成日：2021年11月9日

代諾者用

＜治験スケジュール＞

| 規定日                              |            | 同意   | 本登録  | 投与   | 1日後  | 3日後  | 1週後   | 2週後   | 4週後   | 12週後  | 26週後    | 38週後    | 52週後    | 78週後    | 中止時 | 追跡調査<br>(治験全体の終了まで) |
|----------------------------------|------------|------|------|------|------|------|-------|-------|-------|-------|---------|---------|---------|---------|-----|---------------------|
| 生後日齢                             |            | 3～14 | 3～14 | 5～14 | 6～15 | 8～17 | 12～21 | 19～28 | 33～42 | 89～98 | 187～196 | 271～280 | 369～378 | 551～560 |     |                     |
| Day（投与日=Day0を基準）                 |            | ～0   | ～0   | 0    | 1    | 3    | 7     | 14    | 28    | 84    | 182     | 266     | 364     | 546     |     |                     |
| 検査・観察日の許容範囲                      |            |      |      | 0    | 0    | ±1   | ±2    | ±4    | ±7    | ±14   | ±14     | ±28     | ±28     | ±28     | ±28 |                     |
| 同意                               |            | ●    |      |      |      |      |       |       |       |       |         |         |         |         |     |                     |
| 登録                               |            |      | ●    |      |      |      |       |       |       |       |         |         |         |         |     |                     |
| 治験製品投与                           |            |      |      | ↓    |      |      |       |       |       |       |         |         |         |         |     |                     |
| 原疾患・合併症・母体背景の確認                  |            |      | ●    |      |      |      |       |       |       |       |         |         |         |         |     |                     |
| 身長・体重・頭囲                         |            |      | ●    |      |      |      |       |       | ●     | ●     | ●       | ●       | ●       | ●       |     |                     |
| バイタルサイン（血圧、脈拍（心拍）数、<br>体温）、酸素飽和度 |            |      | ●    | ●    | ●    | ●    | ●     | ●     | ●     | ●     | ●       | ●       | ●       | ●       | ●   |                     |
| 臨床検査<br>★1                       | 血液学的、血液生化学 |      | ●    | ●    | ●    | ●    | ●     | ●     | ●     | ●     | ●       |         | ●       | ●       | ●   |                     |
|                                  | 血液ガス、凝固    |      | ●    | ●    | ●    | ●    |       |       |       |       |         |         |         |         |     |                     |
|                                  | 感染症        |      | ●    |      |      |      |       |       |       |       |         |         |         |         |     |                     |
|                                  | 随時尿        |      | ●    | ●    | ●    |      | ●     | ●     |       |       |         |         |         |         |     |                     |
| けいせい 瘻性の確認 ★2                    |            |      |      |      |      |      |       |       |       | ●     | ●       | ●       | ●       | ●       |     |                     |
| ていげん 定頻、寝返り、座位、はいはいの確認 ★3        |            |      |      |      |      |      |       |       |       |       | ●       | ●       | ●       | ●       |     |                     |
| どっぽ 独歩、有意語の確認 ★4                 |            |      |      |      |      |      |       |       |       |       |         |         | ●       | ●       |     |                     |
| てんかんの確認                          |            |      |      |      |      |      |       |       |       |       |         |         |         |         |     |                     |
| 対面式乳児発達検査 ★5                     |            |      |      |      |      |      |       |       |       |       |         |         |         | ●       |     |                     |
| 頭部MRI ★6                         |            |      | ●    |      |      |      |       | ●     |       |       |         |         |         | ●       | ●   |                     |
| GMFCS-E&R ★7                     |            |      |      |      |      |      |       |       |       |       |         |         |         | ●       |     |                     |
| 併用薬・併用療法の確認                      |            |      |      |      |      |      |       |       |       |       |         |         |         |         | ●   |                     |
| 状況確認                             |            |      |      |      |      |      |       |       |       |       |         |         |         |         |     | ●                   |

★の項目については次ページで説明します。

整理番号：312005  
 治験実施計画書番号：CAMCR-014  
 名古屋大学医学部附属病院 第3.0版  
 作成日：2021年11月9日  
 代諾者用

## ★1 臨床検査（血液検査・尿検査）

1回の採血量は約2～3mLです。

|     |                                                                                                          |
|-----|----------------------------------------------------------------------------------------------------------|
| 血液  | <b>血液学的検査</b><br>赤血球数、ヘモグロビン、ヘマトクリット、白血球数、白血球分画、血小板数                                                     |
|     | <b>血液生化学的検査</b><br>AST、ALT、ALP、 $\gamma$ -GTP、総ビリルビン、直接ビリルビン、LDH、BUN、クレアチニン、クレアチニンキナーゼ、Na、K、Cl、P、CRP、血糖値 |
| 随時尿 | <b>血液ガス</b><br>pH、二酸化炭素分圧（ $pCO_2$ ）、過剰塩基（BE）                                                            |
|     | <b>凝固検査</b><br>PT、APTT、PT-INR、フィブリノーゲン、アンチトロンビンⅢ                                                         |
|     | <b>感染症検査</b><br>HBs抗原、HCV抗体、HIV抗体、HTLV-1抗体、梅毒血清反応                                                        |
|     | タンパク、潜血、糖、pH                                                                                             |

- ★2 痙性（<sup>けいせい</sup>筋緊張<sup>きんきんちよう</sup>や深部腱反射<sup>しんぶけんはんしや</sup>の亢進<sup>かうしん</sup>などの状態）を確認します。
- ★3 定頸（<sup>ていけい</sup>両脇の下に手を入れて体を支えたときに頭がまっすぐに支えられていること）、寝返り、坐位（<sup>ざい</sup>支えなしで、手をつかないで背を伸ばして座れること）、はいはいの状態について確認します。
- ★4 独歩（<sup>どっぽ</sup>ものにつかまらず、一人で歩けること）、有意語（<sup>ゆういご</sup>意味のある単語を一つ以上言えること）について確認します。
- ★5 対面式乳児発達検査：臨床心理士により、発達診断検査を行います。2つの発達診断検査を行います。それぞれの検査で1～2時間程度必要となるため、2日に分けて実施する場合もあります。
- ★6 頭部MRI：<sup>じ ききょうめいがそう</sup>磁気共鳴画像検査。エックス線は使用せず、強い磁石と電磁波を使って体内の状態を断面像として描写する検査です。
- ★7 GMFCS-E&R：<sup>そ だいうんどうのうりよくぶんるい</sup>粗大運動能力分類システム。子供の坐位や移動を中心とした粗大運動能力をもとに、機能レベルを5段階に分類化し評価します。

また、治験に参加する前に通常の診療で実施した検査結果がある場合は、治験のための検査をあらためて行わずに、その検査結果を使用させていただくことがあります。

なお、あなたのお子さんの体の状態によっては、治験で必要とされる検査以外に、私たちの判断で検査を追加する場合がありますのでご了承ください。

## 7. 予測される心身の健康に対する利益と不利益について

### 予測される利益について

新生児低酸素性虚血性脳症に対し、CL2020の細胞を投与することの有効性は現時点で明らかになっていません。このため、この治験に参加することであなたのお子

Matsuyama N, *et al.* *BMJ Open* 2022; 12:e057073. doi: 10.1136/bmjopen-2021-057073

整理番号：312005  
治験実施計画書番号：CAMCR-014  
名古屋大学医学部附属病院 第3.0版  
作成日：2021年11月9日  
代諾者用

症状を示す可能性があります。

• **異所性組織形成・造腫瘍性**

本治験製品の構成成分である間葉系幹細胞は、様々な組織（骨、軟骨、脂肪細胞等）への分化能を有することから、異所性組織形成（目的としない組織になってしまうこと）や腫瘍（がん等）があらわれる可能性が否定できません。ただし、これまでに実施した動物を用いた検討で異所性組織形成や腫瘍の形成は認められませんでした。

• **免疫抑制作用による感染症の増悪**

本治験製品には、免疫抑制作用（ヒトに備わっている、細菌やウイルスなどに抵抗する力を弱める作用）があるため、細菌やウイルスによる感染にかかりやすくなる可能性や、感染にかかった場合に症状が悪化する可能性が否定できません。

• **類似する製品で認められたリスク**

本治験製品に類似した細胞を含む製品を投与した際のリスクとして、細胞塞栓（投与した細胞のかたまりが血管に詰まった状態）、血栓形成（血管の中に血のかたまりが生じた状態）、血管内溶血（血管の中で、血球が壊れた状態）、並びに免疫応答に起因する事象が報告されています。具体的には、本治験製品に類似した細胞を含む製品を用いて日本国内で実施された臨床試験で下記のような有害事象が認められています。

① **肺の循環障害による有害事象**

呼吸困難（2.6%）、低酸素症（2.6%）、酸素飽和度低下（2.6%）、失神寸前の状態（2.6%）、痰貯留（2.6%）

② **血管内溶血による有害事象**

貧血（10.3%）、血中乳酸脱水素酵素（LDH）増加（10.3%）、γ-グルタミルトランスフェラーゼ（γ-GTP）増加（7.7%）、血中ビリルビン（T-Bil）増加（5.1%）、ヘモグロビン（Hb）減少（5.1%）、トランスアミナーゼ（ALTまたはAST）上昇（2.6%）、ハプトグロビン減少（2.6%）

③ **細胞塞栓および局所循環障害**

血栓性微小血管症（細い血管内に血小板のかたまりが生じ、血小板が破壊されて

代諾者用

はしゅせい

がんけん ふしゅ  
胆 吟 浮 睡

Matsuyama N, *et al.* *BMJ Open* 2022; 12:e057073. doi: 10.1136/bmjopen-2021-057073

整理番号：312005  
治験実施計画書番号：CAMCR-014  
名古屋大学医学部附属病院 第3.0版  
作成日：2021年11月9日  
代諾者用

[Redacted text block]

・ 動物に対する試験の結果

[Redacted text block]

[Redacted text block]

[Redacted text block]

[illegible]

以上から、今回の治験で重大な副作用が発現する可能性は低いと考えられます。しかし、現時点では予測できない症状が発生する可能性もあります。また、この治験への参加に伴い、通常の診療に比べて、お子さんのからだの状態や神経発達を確認するための検査や、通院の回数が増える負担がかかることが予想されます。治験期間中はもちろん、治験を終了（中止）した後でも、何か気になる症状を感じたときは、その症状の程度にかかわらず、すぐに私たちにお知らせください。あなたのお子さんの体の状態を確認して、検査や治療が必要かどうかを判断し、適切に処置いたします。

ここまでの説明を読んで、あなたがこの治験ではなく通常の治療（経過観察、並びに神経症状が出現した場合はその対症療法）を希望される場合、また、治験に参加された後に中止となった場合は、あなたのお子さんにとって、最も良いと思われる治療方法を、あなたと相談の上で決めていきます。

整理番号：312005  
治験実施計画書番号：CAMCR-014  
名古屋大学医学部附属病院 第3.0版  
作成日：2021年11月9日  
代諾者用

## 8. 治験の中止について

あなたに治験参加の同意をいただいた後でも、次のような場合には治験へ参加していただけないことや、治験を中止することがありますのでご了承ください。

- 1) あなたが治験の中止を申し出た場合
- 2) 検査などの結果、あなたのお子さんの症状や体の状態が治験への参加基準に合わないことがわかった場合
- 3) 参加いただいている途中で、あなたのお子さんの体の状態の変化やその他の理由により治験をやめたほうがよいと私たちが判断した場合
- 4) あなたのお子さんが予定通りに来院できなくなった場合
- 5) 厚生労働省や私たちの判断によりこの治験が中止される場合

## 9. この治験に関する新たな情報が得られた場合について

治験に参加されている期間中、あなたのお子さんの健康や治験継続の意思に影響を与えるような新たな情報が得られた場合は、すみやかにお知らせいたします。その場合には、治験を続けることに関してもう一度参加の意思を確認させていただくことがあります。

## 10. 副作用などの健康被害が生じた場合の補償について

この治験は、これまでの結果に基づいて科学的に計画され、慎重に行われます。もしもこの治験に参加している間に、あなたのお子さんに副作用などの健康被害が生じた場合には、すぐにお知らせください。ただちに最善と考えられる治療や処置を行い、適切に対処します。その際の医療費は、通常診療と同様に、あなたのお子さんが加入している健康保険が適用されます。医療費・医療手当（治療に伴う医療費以外の費用を補てんする一定の金額）が支払い可能な場合もありますので、適宜ご確認ください。

また、この治験に参加することによって起こった重度の後遺障害（医薬品副作用被害救済制度の後遺障害1級、2級に相当する）および死亡に至るような健康被害に対しては、この治験で用意している補償制度により補償金の支払いが受けられることがあります。その際あなたが、健康被害と治験との関連性を証明する必要はありません。

整理番号：312005  
治験実施計画書番号：CAMCR-014  
名古屋大学医学部附属病院 第3.0版  
作成日：2021年11月9日  
代諾者用

補償を受けることができるのは、治験への参加に同意いただいた（同意文書に署名した）日以降に生じた、あなたのお子さんが治験に参加したことによる健康被害に限られます。

ただし、下記の場合などは、補償されないことがあります。

- 1) 健康被害と治験との法律的な因果関係が存在しない場合
- 2) 治験製品の効き目が不十分であることによって症状が悪化した場合
- 3) その健康被害があなたの故意または重大な過失によって生じた場合

また、健康被害と治験との関連性がなく、治験とは別に賠償責任が生じている場合は、補償の対象とはなりません。その場合、損害賠償請求のための訴えを起こすことも可能です。補償の詳細につきましては、「治験に係る補償制度の概要について」をご覧ください。

健康被害が生じた場合は、病院の相談窓口（21 ページ参照）までご連絡ください。

## 11. 費用の負担について

この治験で使用するCL2020は、提供会社（株式会社生命科学インスティテュート）から無償で提供されます。その他の医療費（初診料や再診料、入院費用、薬剤費用、検査代など）については、あなたのお子さんが加入する健康保険が適用されます。

また、治験参加に伴う交通費などの負担を軽減するため、この治験で規定された来院1回（入院1回）につき負担軽減費として7,000円を、あなたの希望を確認した上でお支払いします。支払いは、原則として来院された月ごとにまとめて、その翌々月までに、あなたの指定する銀行、信用金庫または農業協同組合の口座に東海国立大学機構から振り込むことになります。なお、口座番号、電話番号などの個人情報厳重に管理し、振り込みの手続きのみに適切に使用いたします。

なお、この負担軽減費の受け取りについては、税法上、雑所得としての取扱いを受けることになります。年間の受け取り額により確定申告を行う必要がありますので、あらかじめご了承ください。また、生活保護の支給を受けられている方は、支給額が変更される場合がありますので、ご注意ください。詳しくは管轄の福祉事務所にご相談ください。

整理番号：312005  
治験実施計画書番号：CAMCR-014  
名古屋大学医学部附属病院 第3.0版  
作成日：2021年11月9日  
代諾者用

## 12. プライバシーの保護について

この治験で得られた結果は、私たちが報告書にまとめて、厚生労働省などの規制当局に提出する資料となります。また、治験の結果は学会や医学雑誌などに発表されることや治験製品の提供会社に提供することもあります。さらに、臨床試験情報のデータベースである臨床研究実施計画・研究概要公開システム(<https://jrct.niph.go.jp/>)などで公表されます。ただし、いずれの場合にも、あなたやあなたのお子さんの個人情報（名前や住所、電話番号など）が公表されることは一切ありません。また、治験により得られたデータが他の目的に使用されることも原則ありません（使用する場合は、別途同意を取得させていただきます）。例えば、この治験のためにあなたのお子さんから提供された血液や尿などの検体は他の目的で使用するのではなく、検査を終えた後に廃棄いたします。

また、この治験が適正に行われているかどうかを確認するために、治験の関係者（当院の担当者、開発業務受託機関の担当者、厚生労働省などの規制当局の職員、当院の治験審査委員会の委員、治験製品の提供会社の担当者など）が、あなたのお子さんの診療に関する記録（他の診療科の分や治験参加以前の期間も含む）を閲覧することになります。しかし、このような場合でも、これらの関係者には守秘義務が課せられていますので、あなたやあなたのお子さんのプライバシーにかかわる情報は保護されます。

あなたのお子さんが他院や他の診療科に受診されているもしくは受診される場合、あなたのお子さんの安全を守るため、また、治験による影響の有無を確認するために、治験に参加していることを担当医に連絡し、治療の内容（使用した薬など）について問い合わせをさせていただくことがあります。

なお、最後のページにあります同意文書に署名されますと、上記の治験の関係者による閲覧、および私たちが必要と判断したあなたの診療情報（治療内容など）を入手することについてご了解いただいたことになります。

## 13. 治験への参加の自由と同意撤回の自由について

この治験に参加するかどうかについては、ご家族と相談するなどして十分に考えていただき、あなた自身の自由な意思でお決めください。また、一度同意していただい

整理番号：312005  
治験実施計画書番号：CAMCR-014  
名古屋大学医学部附属病院 第3.0版  
作成日：2021年11月9日  
**代諾者用**

た後でも、いつでも自由に同意を撤回して治験への参加をやめることができますので、遠慮なく私たちに伝えてください。この治験に参加されなくても、あなたやあなたのお子さんが不利益を被ることは一切ありません。これまで通り、あなたのお子さんにとって最も良いと思われる治療法を、あなたと相談の上で決めていきます。

ただし、治験製品を使用された後に治験への参加をやめられる場合は、あなたのお子さんに対する治験製品の影響を確認し、あなたのお子さんの健康管理のために、必要に応じて適切な検査を受けていただき、医学的に問題がないかを確認させていただく場合があります。

また、途中で治験への参加の同意を撤回し、中止した場合は、それまでに得られた記録や結果の使用の可否について、あなたの意思を確認させていただきます。

## 14. 守っていただきたいことについて

この治験に参加していただける場合は、次のことをお守りください。

- ① 治験に参加している間は、私たちの指示通り、スケジュールに従い、必ず診察、検査、投薬などを受けてください。もし、来院予定日に来院できない場合は、必ず私たちに連絡してください。
- ② 他の薬との組み合わせで治験製品の作用が強まったり弱まったりすることがありますので、普段服用している薬や、他の病院からもらっている薬がある場合には、治験に参加される前に必ず私たちに伝えてください。  
また、治験中に他の病院で治療を受ける場合や新たに薬を使用される場合は、事前に私たちに相談してください。緊急の場合は、同意をいただいた後にお渡しする「治験参加カード」を必ず医師または看護師、薬剤師にお見せください。
- ③ 治験期間中だけでなく、治験終了後も有害事象が生じたり、何か心配事があった場合には、いつでも連絡してください。

## 15. 利益相反について

り えきそうはん シーオーアイ  
利益相反（COI：Conflict of Interest）とは「主に経済的な利益関係によって公正かつ適正な判断がゆが歪められてしまうこと、または、歪められているのではないかと疑われかねない事態」のことを指します。具体的には、製薬企業や医療機器メー

整理番号：312005  
治験実施計画書番号：CAMCR-014  
名古屋大学医学部附属病院 第3.0版  
作成日：2021年11月9日  
代諾者用

カーから研究者（治験責任（分担）医師等）へ提供される謝金、研究費、サービス及び物品等、ならびに研究に関連する企業の株式の保有等がこれに当たります。治験等の信頼性を確保するため、COIについては、透明性が確保され、科学的な客観性を保証するように適正に管理されることが必要です。

この治験は、名古屋大学からの助成を受けて、また、治験責任医師を含む関係者の研究費を用いて実施されます。また、この治験は、名古屋大学医学部附属病院が、株式会社生命科学インスティテュートから無償提供を受けたCL2020を用いて実施します。この治験で使用するCL2020の生産物賠償責任保険については、株式会社生命科学インスティテュートが負担します。

名古屋大学は、これまでの研究成果を基に、本治験製品の新生児低酸素性虚血性脳症に対する開発に関する特許出願を、株式会社生命科学インスティテュートと共に行っており、治験責任医師を含む関係者が発明者として、将来報酬を得る可能性があります。また、治験責任医師を含む関係者が、本治験以外の研究で株式会社生命科学インスティテュートから共同研究費を受けて、さらに同社のコンサルタントとして業務を引き受けています。ただし、この治験は上記の利益相反について、当院の治験審査委員会（治験審査委員会が必要と判断した場合は、さらに研究利益相反マネジメント委員会）で審査を受け、適正に管理された上で実施されます。また、この治験の結果の解析は、解析計画書に従って実施され、かつ第三者機関による監査を受け、研究の公正性の確保に努めます。そのため、治験の結果について、発明者である治験責任医師を含む関係者や株式会社生命科学インスティテュートに都合の良い結果を意図的に導くことはありません。

## 16. 知的財産権について

この治験の結果として、特許などの<sup>ちてきさいせんけん</sup>知的財産権が生み出される場合もありますが、あなたやあなたのお子さんにはその権利は発生しません。

整理番号：312005  
治験実施計画書番号：CAMCR-014  
名古屋大学医学部附属病院 第3.0版  
作成日：2021年11月9日  
代諾者用

### ＜担当医師の連絡先および病院の相談窓口＞

治験について何か知りたいことや、何か心配なことがありましたら、担当医師に遠慮なくお尋ねください。

また、治験終了後の結果についてお知りになりたい方は担当医師もしくは病院の相談窓口にご連絡ください。ご連絡いただいた時点で当院が知り得ている情報について説明させていただきます。

●治験責任医師： 総合周産期母子医療センター

講師 佐藤 義朗

●あなたの治験担当医師：所属： \_\_\_\_\_

●連絡先電話番号

名古屋大学医学部附属病院（代表）： \_\_\_\_\_ 内線 \_\_\_\_\_

＜夜間・休日のみ＞総合周産期母子医療センターNICU： \_\_\_\_\_

担当医師以外の窓口として、先端医療・臨床研究支援センターがあります。何かございましたら、遠慮なくお尋ねください。

●相談窓口： 先端医療・臨床研究支援センター

（名古屋大学医学部附属病院 中央診療棟 A 地下1階）

●担当治験コーディネーター（CRC）： \_\_\_\_\_

●電話番号（直通）： \_\_\_\_\_

＜平日 8:30～17:30＞

以上、この治験の内容について十分ご理解いただいたうえで、参加していただける場合は、最終ページの同意文書に同意年月日の記載と署名をしてご提出ください。記載していただきました同意文書は3部作成し、あなたが1部、病院が2部それぞれ保管することになります。なお、この説明文書と同意文書（3枚目：患者さん用）を大切に保管しておいてください。

整理番号：312005  
治験実施計画書番号：CAMCR-014  
名古屋大学医学部附属病院 第3.0版  
作成日：2021年11月9日

代諾者用

ID番号：—  
一枚目 カルテ用 ☐ (再同意)

同意文書

名古屋大学医学部附属病院長 殿

私は、「低体温療法を実施した新生児低酸素性虚血性脳症に対するCL2020の安全性及び  
忍容性を検討する用量漸増臨床試験」の治験に子供を参加させるにあたり、説明文書を受け  
取り、その内容について説明を受けました。本治験の内容を十分に理解しましたので、今回  
の治験に参加することについて私の自由意思にもとづいて同意いたします。なお、いつでも  
私の意思によって中止できること、中止後も必要かつ可能な治療行為が行われ、病院および  
治験責任(分担)医師からなんら不利益を受けることがないことを治験責任(分担)医師に確認  
したため、ここに同意し署名致します。

同意日時：西暦 年 月 日 時 分 代諾者氏名 \_\_\_\_\_ 続柄： \_\_\_\_\_  
(患者氏名： \_\_\_\_\_)

説明日時：西暦 年 月 日 時 分 所属 \_\_\_\_\_  
治験責任(分担)医師名 \_\_\_\_\_

説明文書に基づき患児の代諾者に説明を行うとともに、説明文書を手渡しました。

< 治験協力者による補助説明時 >

説明日時：西暦 年 月 日 時 分 所属 \_\_\_\_\_  
治験協力者名 \_\_\_\_\_

同意確認および同意文書の手交日時：西暦 年 月 日 時 分

整理番号：312005  
治験実施計画書番号：CAMCR-014  
名古屋大学医学部附属病院 第3.0版  
作成日：2021年11月9日

代諾者用

ID番号：—  
二枚目 センター用 ☐ (再同意)

同意文書

名古屋大学医学部附属病院長 殿

私は、「低体温療法を実施した新生児低酸素性虚血性脳症に対するCL2020の安全性及び忍容性を検討する用量漸増臨床試験」の治験に子供を参加させるにあたり、説明文書を受け取り、その内容について説明を受けました。本治験の内容を十分に理解しましたので、今回の治験に参加することについて私の自由意思にもとづいて同意いたします。なお、いつでも私の意思によって中止できること、中止後も必要かつ可能な治療行為が行われ、病院および治験責任(分担)医師からなんら不利益を受けることがないことを治験責任(分担)医師に確認したため、ここに同意し署名致します。

同意日時：西暦 年 月 日 時 分 代諾者氏名 \_\_\_\_\_ 続柄： \_\_\_\_\_  
(患者氏名： \_\_\_\_\_)

説明日時：西暦 年 月 日 時 分 所属 \_\_\_\_\_  
治験責任(分担)医師名 \_\_\_\_\_

説明文書に基づき患児の代諾者に説明を行うとともに、説明文書を手渡しました。

< 治験協力者による補助説明時 >

説明日時：西暦 年 月 日 時 分 所属 \_\_\_\_\_  
治験協力者名 \_\_\_\_\_

同意確認および同意文書の手交日時：西暦 年 月 日 時 分

負担軽減費の受け取りを希望しますか(どちらかに○)： 希望する / 希望しない

「希望する」と答えた方は、以下に振込先および連絡先をご記入ください。

|                  |                   |  |  |  |                          |  |  |  |    |   |    |
|------------------|-------------------|--|--|--|--------------------------|--|--|--|----|---|----|
| フリガナ             |                   |  |  |  |                          |  |  |  |    |   |    |
| 振込先口座            | 銀行・信用金庫<br>農業協同組合 |  |  |  |                          |  |  |  | 支店 |   |    |
| 金融機関コード          |                   |  |  |  | 支店コード                    |  |  |  | 普通 | ・ | 当座 |
| フリガナ             |                   |  |  |  | 口座番号                     |  |  |  |    |   |    |
| 口座名義             |                   |  |  |  | ※7桁未満の場合は<br>右詰で先頭に0をつける |  |  |  |    |   |    |
| 連絡先<br>(住所・電話番号) | 〒 —               |  |  |  |                          |  |  |  |    |   |    |
|                  | TEL： — —          |  |  |  |                          |  |  |  |    |   |    |

整理番号：312005

治験実施計画書番号：CAMCR-014

名古屋大学医学部附属病院 第3.0版

作成日：2021年11月9日

代諾者用

三枚目

患者さん用

☐ (再同意)

同意文書

名古屋大学医学部附属病院長 殿

私は、「低体温療法を実施した新生児低酸素性虚血性脳症に対するCL2020の安全性及び忍容性を検討する用量漸増臨床試験」の治験に子供を参加させるにあたり、説明文書を受け取り、その内容について説明を受けました。本治験の内容を十分に理解しましたので、今回の治験に参加することについて私の自由意思にもとづいて同意いたします。なお、いつでも私の意思によって中止できること、中止後も必要かつ可能な治療行為が行われ、病院および治験責任(分担)医師からなんら不利益を受けることがないことを治験責任(分担)医師に確認したため、ここに同意し署名致します。

同意日時：西暦      年    月    日    時    分 代諾者氏名 \_\_\_\_\_ 続柄： \_\_\_\_\_

(患者氏名： \_\_\_\_\_)

説明日時：西暦      年    月    日    時    分 所属 \_\_\_\_\_

治験責任(分担)医師名 \_\_\_\_\_

説明文書に基づき患児の代諾者に説明を行うとともに、説明文書を手渡しました。

< 治験協力者による補助説明時 >

説明日時：西暦      年    月    日    時    分 所属 \_\_\_\_\_

治験協力者名 \_\_\_\_\_

同意確認および同意文書の手交日時：西暦      年    月    日    時    分

負担軽減費の受け取りを希望しますか(どちらかに○)： 希望する / 希望しない

「希望する」と答えた方は、以下に振込先および連絡先をご記入ください。

|                  |                    |  |  |  |                          |  |  |  |               |  |
|------------------|--------------------|--|--|--|--------------------------|--|--|--|---------------|--|
| フリガナ             |                    |  |  |  |                          |  |  |  |               |  |
| 振込先口座            | 銀行・信用金庫<br>農業協同組合  |  |  |  |                          |  |  |  | 支店            |  |
| 金融機関コード          |                    |  |  |  | 支店コード                    |  |  |  | 普通    ・    当座 |  |
| フリガナ             |                    |  |  |  | 口座番号                     |  |  |  |               |  |
| 口座名義             |                    |  |  |  | ※7桁未満の場合は<br>右詰で先頭に0をつける |  |  |  |               |  |
| 連絡先<br>(住所・電話番号) | 〒      —           |  |  |  |                          |  |  |  |               |  |
|                  | TEL：      —      — |  |  |  |                          |  |  |  |               |  |
